# Supplementary material for: The Drosophila microRNA bantam regulates excitability in adult mushroom body output neurons to promote early night sleep
Source: PubMed Central journal article supplement — iScience. 2022 Aug 1;25(9):104874. doi: 10.1016/j.isci.2022.104874 (PMC9400086; doi:10.1016/j.isci.2022.104874), 2022-08-01
Supplement: mmc1.pdf [file mmc1.pdf]

**Supplemental information**

**The *Drosophila* microRNA bantam regulates  
excitability in adult mushroom body  
output neurons to promote early night sleep**

**Michael Hobin, Katherine Dorfman, Mohamed Adel, Emmanuel J. Rivera-  
Rodriguez, Elena A. Kuklin, Dingbang Ma, and Leslie C. Griffith**

### A Panneuronal Developmental KD

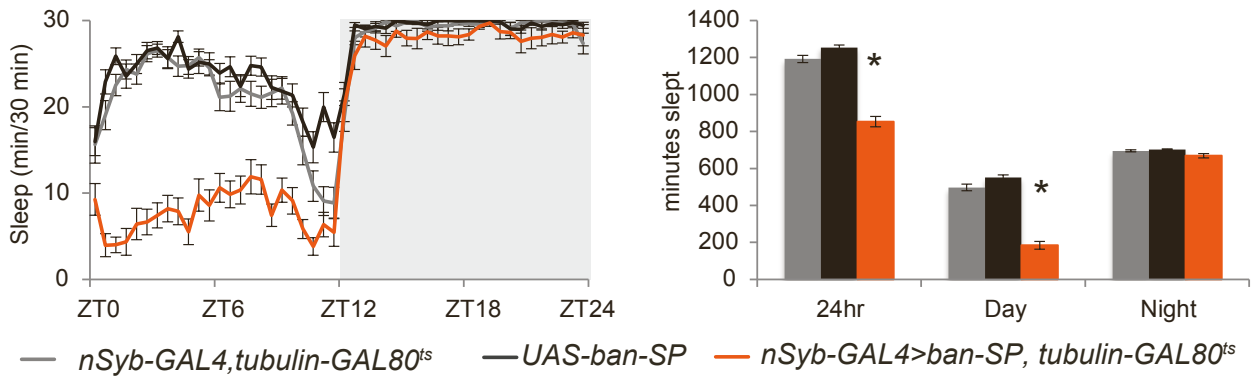

### B Panneuronal overexpression of *ban*

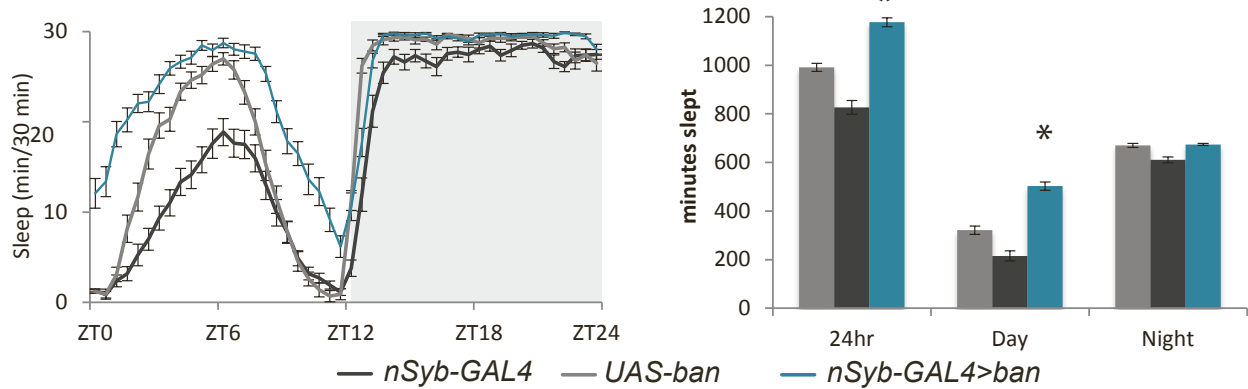

### C MB Kenyon Cell KD

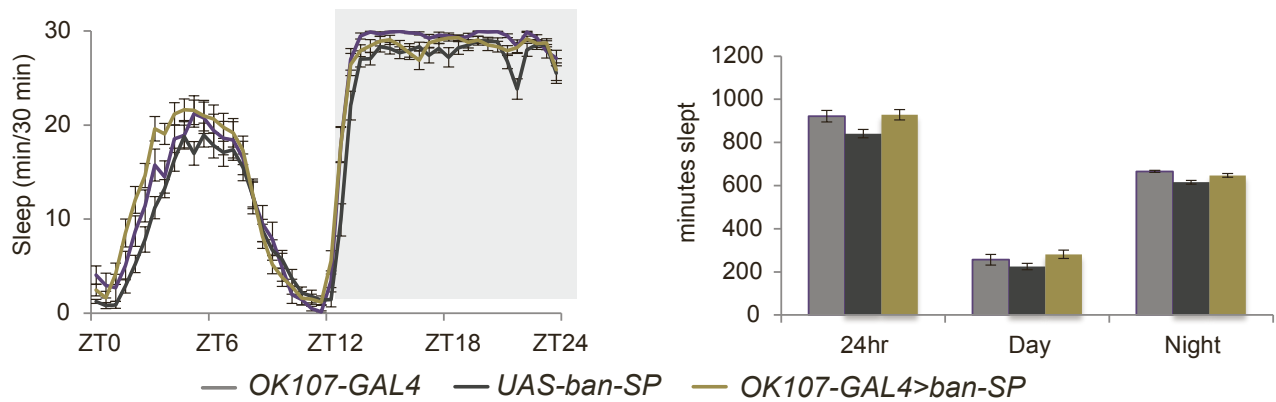

### D Dopaminergic Neuron KD

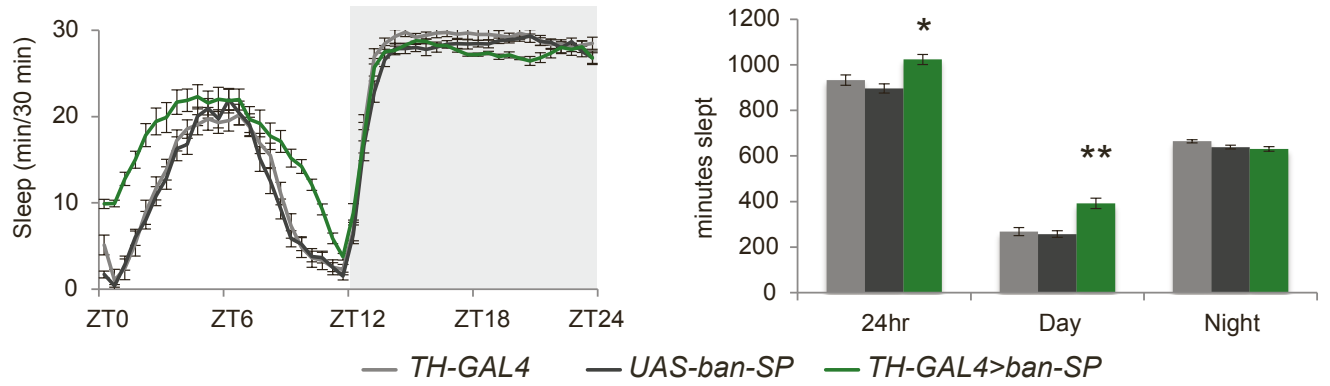

### E Male MBON KD

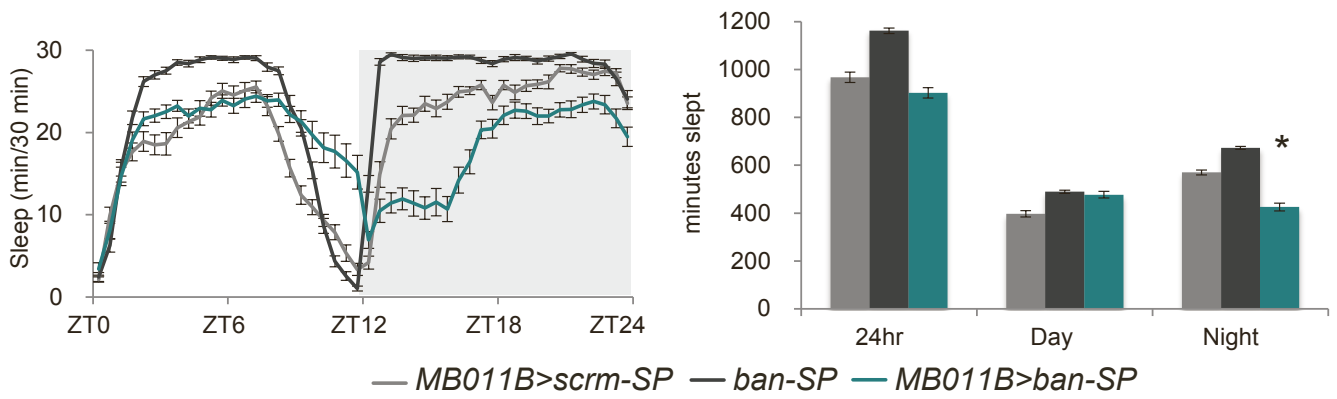

### F P(wake) with MBON KD

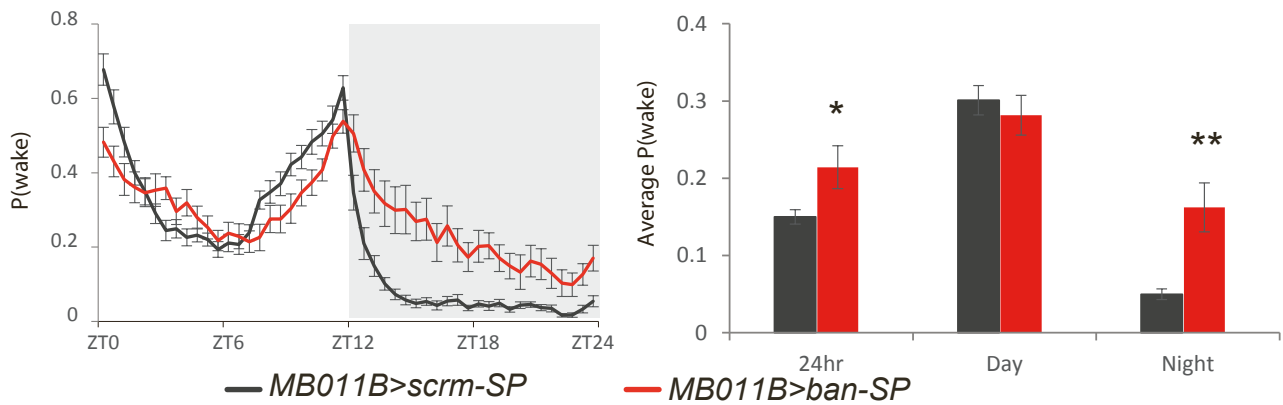

**Figure S1. Related to Figure 1.**

**Ban has multiple roles in regulation of sleep.** Knockdown of *ban* during development and in diverse adult cell groups demonstrates that *ban* has roles at multiple stages of development and in several distinct neuronal populations. This demonstrates the utility of the cell-specific sponge approach. Note that the role of *ban* in dopaminergic neurons appears to be opposite to its role in MBONs i.e. it is wake-promoting rather than sleep promoting.

(A) Developmental knockdown of *ban* primarily affects daytime sleep. Sleep data for *nSyb>ban-SP+tubulin-GAL80<sup>ts</sup>* (n=26), *nSyb>scr-SP+tubulin-GAL80<sup>ts</sup>* (n=27) and *UAS-ban-SP* control (n=31) raised at 29°C and tested at 18°C (mean± SEM). \* represents  $P \leq .0001$  using a one-way ANOVA with Tukey multiple comparisons test.

(B) Overexpression of *ban* in all neurons increases sleep. (B) Sleep data for *nSyb>ban* (n=29), *nSyb-GAL4* (n=30) and *UAS-ban* (n=29) (mean± SEM). \* represents  $P \leq .0001$  using a one-way ANOVA with Tukey multiple comparison test.

(C) Knockdown of *ban* in the intrinsic cells of the mushroom body. Sleep data for *OK107>ban-SP* (n=30), *OK107-GAL4* control (n=28) and *UAS-ban-SP* control (n=30) (mean ± SEM).

(D) Knockdown of *ban* in dopaminergic neurons. Sleep data for *TH>ban-SP* (n=32), *TH-GAL4* (n=31) and *UAS-ban-SP* (n=30) (mean± SEM). \* represents  $P \leq .05$  using the Kruskal-Wallis Test with Dunn's multiple comparison test. \*\* represents  $P \leq .0001$  using a one-way ANOVA with Tukey's multiple comparison test.

(E) Knockdown of *ban* in MBONs is not sexually dimorphic. Sleep data for male *MB011B>UAS-ban-SP* (n=31), *MB011B>UAS-scr-SP* (n=32) and *UAS-ban-SP* (n=32) (mean± SEM). \* represents  $P \leq .0001$  using the Kruskal-Wallis Test with Dunn's multiple comparison test.

(F) P(Wake) is significantly reduced at night by *ban* knockdown in MBONs. Data for *MB011B>ban-SP* (N=17) and scramble controls (N=24) shown as mean± SEM. \* represents  $P \leq .05$  and \*\* represents  $P \leq .0001$  using the Mann-Whitney Test.

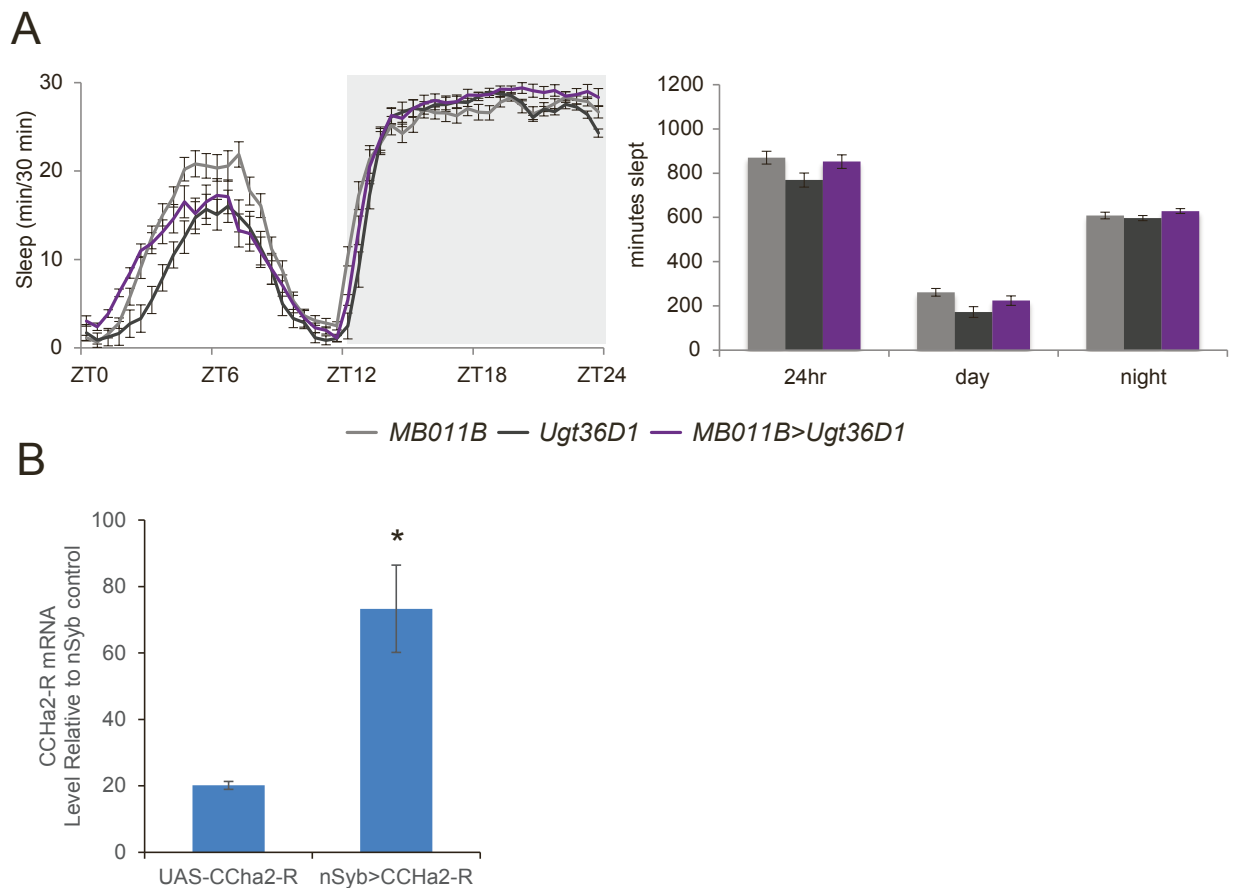

**Figure S2. Related to Figure 2.**

Effects of overexpression of putative ban targets on sleep and effectiveness of overexpression transgene. (A) *Ugt36D1* does not affect sleep. Sleep data for *MB011B> Ugt36D1* (n=24), *MB011B/+* control (n=27) and *UAS-Ug36D1/+* control (n=28) (mean± SEM). Overexpression of this gene product in MBONs has no effect on sleep. Note that the GAL4 control data set is the same as shown in Figure 2D as these lines were all run concurrently. (B) qPCR for mRNA from *nSyb*, *nSyb>CCHa2-R* and *UAS-CCHa2R* adult flies using *CCHa2-R* primers. Mean value (± SEM) for three replications. \* represents  $P \leq .05$  using One-Way ANOVA with Tukey-Kramer test.

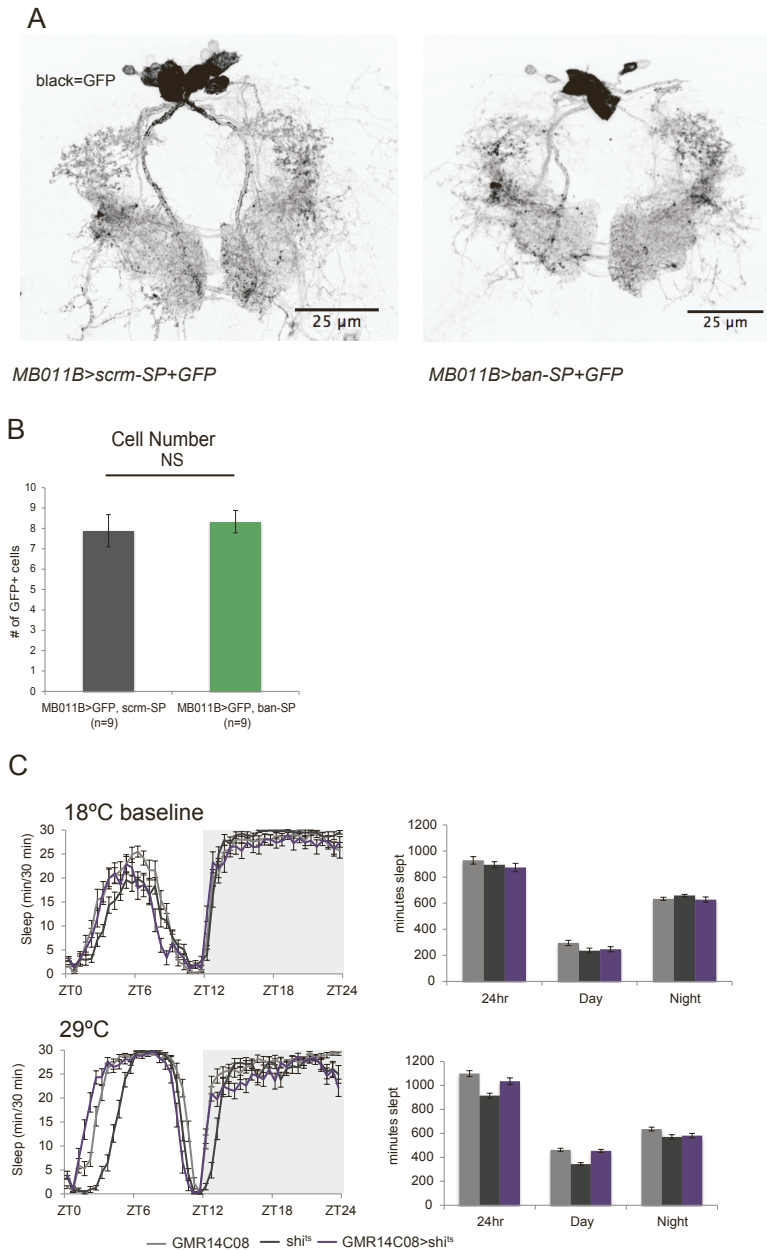

**Figure S3. Related to Figure 3.**

$\gamma 5\beta'2a/\beta'2mp/\beta'2mp\_bilateral$  MBONs develop normally when *ban* is disrupted. Knockdown of *ban* in the  $\gamma 5\beta'2a/\beta'2mp/\beta'2mp\_bilateral$  MBONs does not change cell number or gross morphology. The output of these cells does not contribute significantly to baseline sleep arguing that their activity is recruited in specific contexts to alter early night sleep. (A) IHC anti-GFP staining of representative central brains of *MB011B>CD8::GFP+UAS-scr-SP* and *MB011B>CD8::GFP ban-SP* flies. Scale bar is 25  $\mu$ m. (B) Quantification of the number of GFP-positive cells per brain. Data shown as (mean  $\pm$  SEM). (C) Sleep data for *GMR14C08>shi<sup>ts</sup>* (n=22) *GMR14C08-GAL4/+* control (n=27) and *UAS-shi<sup>ts</sup>/+* control (n=31) at 18°C and 29°C. Data shown as (mean  $\pm$  SEM). No significant change in sleep was seen at temperatures where neurotransmission is blocked.
